# Supplementary material for: Minute-Made, High-Efficiency Nanostructured Bi2Te3 via High-Throughput Green Solution Chemical Synthesis
Source: MDPI journal article supplement (doi:10.3390/nano11082053), 2021-08-12
Supplement: s1 [file s1]

# Supplementary Material

## for

# Minute-made, high efficiency nanostructured Bi<sub>2</sub>Te<sub>3</sub> via high-throughput green solution chemical synthesis

Bejan Hamawandi<sup>1\*</sup>, Hazal Batili<sup>1</sup>, Moon Paul<sup>1</sup>, Sedat Ballikaya<sup>2</sup>, Nuzhet I. Kilic<sup>1</sup>, Rafal Szukiewicz<sup>3</sup>, Maciej Kuchowicz<sup>3</sup>, Mats Johnsson<sup>4</sup>, Muhammet S. Toprak<sup>1\*</sup>

<sup>1</sup> Department of Applied Physics, KTH Royal Institute of Technology, 10691 Stockholm, Sweden

<sup>2</sup> Department of Physics, University of Istanbul, Istanbul, 34135, Turkey

<sup>3</sup> Institute of Experimental Physics, University of Wroclaw, Maxa Born 9, 50-204 Wroclaw, Poland

<sup>4</sup> Department of Materials and Environmental Chemistry, Stockholm University, SE-106 91 Stockholm, Sweden

\*[bejan@kth.se](mailto:bejan@kth.se) \*[toprak@kth.se](mailto:toprak@kth.se)

**Table S1.** Survey of the synthesis methods, reaction conditions, morphology and size of Bi<sub>2</sub>Te<sub>3</sub>

| Composition                                                      | Morphology                                        | Synthesis Method                            | Temperature and Time      | Dimensions  | Reference |
|------------------------------------------------------------------|---------------------------------------------------|---------------------------------------------|---------------------------|-------------|-----------|
| Bi <sub>2</sub> Te <sub>3</sub>                                  | Nanotubes                                         | Ultrasonic-assisted hydrothermal            | 180°C, 48 h               | 50-1000 nm  | [1]       |
| Ag, Sb, Sn Doped Bi <sub>2</sub> Te <sub>3</sub>                 | Nanoparticles                                     | Ultrasonic-assisted hydrothermal            | 200°C, 3 h                | 28-40 nm    | [2]       |
| Bi <sub>2</sub> Te <sub>3</sub>                                  | Nanoparticles                                     | Ultrasonic-assisted hydrothermal            | 70°C, 16 h, 20 h and 40 h | 10-20 nm    | [3]       |
| Bi <sub>2</sub> Te <sub>3</sub>                                  | Thin film                                         | MOCVD                                       | 450°C                     | -           | [4]       |
| Bi <sub>2</sub> Te <sub>3</sub> /Sb <sub>2</sub> Te <sub>3</sub> | 2D superlattice and thin films                    | MOCVD                                       | 350°C                     | -           | [5]       |
| Bi <sub>2</sub> Te <sub>3</sub>                                  | Nanowires and nanoribbons                         | VLS                                         | 275 - 290°C               | 50nm-13µm   | [6]       |
| Bi <sub>2</sub> Te <sub>3</sub>                                  | Nanoparticles                                     | Microemulsion                               | -                         | 10 nm       | [7]       |
| Bi <sub>2</sub> Te <sub>3</sub>                                  | Nanoparticles and nanorods                        | Refluxing hydrothermal                      | 100°C, 2-24 h             | 15-100 nm   | [8]       |
| Bi <sub>2</sub> Te <sub>3</sub>                                  | Nanowires                                         | Electrodeposition                           | RT                        | 40-250 nm   | [9]       |
| Bi <sub>2</sub> Te <sub>3</sub>                                  | Nanoparticles                                     | Co-precipitation                            | RT                        | 60-90 nm    | [10]      |
| Bi <sub>2</sub> Te <sub>3</sub>                                  | Nanoparticles                                     | co-precipitation                            | 400°C<br>2h               | 80 nm       | [11]      |
| Bi <sub>2</sub> Te <sub>3</sub>                                  | Nanosheets, nanorags, nano sheet-rod and nanorods | Solvothermal DMF, pyridine, acetone, ethano | 100–180°C,<br>10–50 h     | 10 nm-10 µm | [12]      |

| Composition                                     | Morphology                          | Synthesis Method                    | Temperature and Time         | Dimensions                                                      | Reference |
|-------------------------------------------------|-------------------------------------|-------------------------------------|------------------------------|-----------------------------------------------------------------|-----------|
| $\text{Bi}_2\text{Te}_3$                        | Nanoparticles and nanowire          | Solvothermal DMF                    | 150°C, 24 h                  | 15 nm-1 $\mu\text{m}$                                           | [13]      |
| $\text{Bi}_2\text{Te}_3$                        | Nanoparticles and nanorod           | Solvothermal DMF                    | 100–180°C, 10–50 h           | 10-150 nm                                                       | [14]      |
| $\text{Bi}_2\text{Te}_3$                        | Nanoparticles and nanoplates        | Solvothermal Water, ethylene glycol | 60°C, 120°C and 180°C, 16 h  | 30 nm                                                           | [15]      |
| $\text{Bi}_2\text{Te}_3$                        | Nanoplates                          | Thermolysis Oleic acid              | 210°C, 24 h                  | 30-200 nm                                                       | [16]      |
| $\text{Bi}_2\text{Te}_3$                        | Nanoflower                          | Solvothermal water and ethanol      | 180°C, 8 h                   | 30 nm-2 $\mu\text{m}$                                           | [17]      |
| $\text{Bi}_2\text{Te}_3$                        | Nanoparticles                       | Hydrothermal                        | 100°C, 48 h                  | 10 nm                                                           | [18]      |
| $\text{Bi}_2\text{Te}_3$                        | Nanotubes                           | Hydrothermal                        | 150°C, 24 h                  | 30 nm-1 $\mu\text{m}$                                           | [19]      |
| $\text{Bi}_2\text{Te}_3$                        | Nanosheets and nanoplates           | Hydrothermal                        | 120°C, 12 h                  | 50-500 nm                                                       | [20]      |
| $\text{Bi}_2\text{Te}_3$                        | Nanowires                           | Hydrothermal                        | 65°C, 48 h                   | 15 nm-1 $\mu\text{m}$                                           | [21]      |
| $\text{Bi}_2\text{Te}_3$                        | Nanoplates, nanorods, and nanotubes | Hydrothermal                        | 150°C, 180°C and 210°C, 24 h | 20 nm-2 $\mu\text{m}$                                           | [22]      |
| $\text{Bi}_2\text{Te}_3$                        | Nanorods and nanoflakes             | MW-assisted polyol method           | 0.5–6 h                      | 20-400 nm                                                       | [23]      |
| $\text{Bi}_{0.5}\text{Sb}_{1.5}\text{Te}_3$     | Nanoplates                          | Hydrothermal                        | 150°C, 24 h                  | 30 nm- $\mu\text{m}$                                            | [24]      |
| $\text{Bi}_2\text{Te}_3/\text{Sb}_2\text{Te}_3$ | Nanoplates                          | Refluxing Water , ammonia           | 90°C, 18 h                   | 13-80 nm                                                        | [25]      |
| $\text{Bi}_2\text{Te}_3$                        | Nanowire                            | Hydrothermal                        | 65°C for 72 h                | Diameter: 15–20 nm Length: 1 $\mu\text{m}$                      | [26]      |
| $\text{Bi}_2\text{Te}_3$                        | Nanorods and nanoflakes             | MW-assisted polyol method           | 0.5–6 h                      | NR Width:20–50 nm NR length: 200–400 nm NF length: 90 to 150 nm | [23]      |
| $\text{Bi}_{0.5}\text{Sb}_{1.5}\text{Te}_3$     | Nanoplates                          | Hydrothermal                        | 150°C, 24 h                  | Length: 100nm - $\mu\text{m}$ Thickness: 30 nm to 100 nm        | [24]      |
| $\text{Bi}_{2-x}\text{Sb}_x\text{Te}_3$         | Nanoplates                          | MW-assisted Polyol method           | 220 °C, 2 mins               | Length: 50 - 500 nm Thickness: 50 nm                            | [27]      |

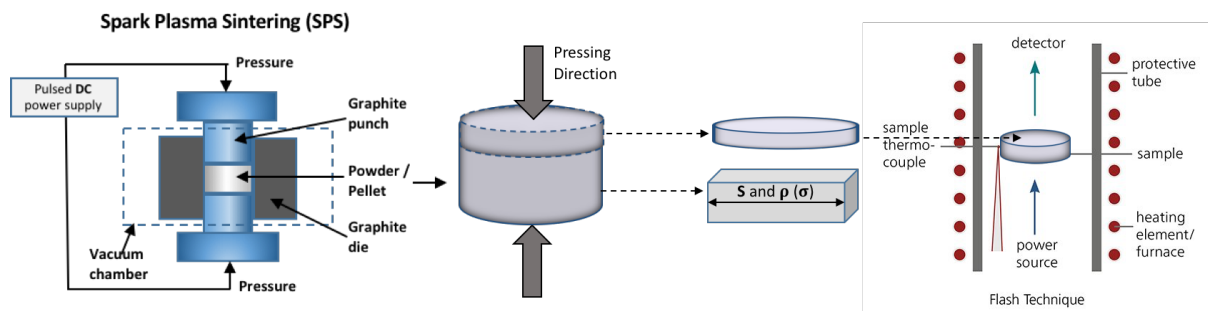

**Figure S1:** Schematic of Spark Plasma Sintering (SPS) process, sample geometry for thermal diffusivity, using Laser Flash technique, and power factor measurements.

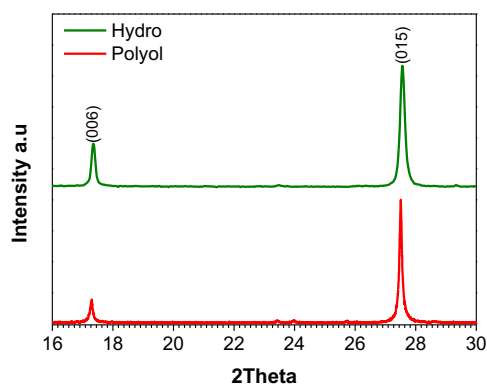

**Figure S2:** XRPD patterns showing a close up of the peaks with Miller indices of (006) and (015) for both the samples after SPS process. The relative peak intensity ratio ( $I_{006} / I_{015}$ ) is a good indicative of texturing within the material, and was estimated as 0.38 for the Hydro-Bi<sub>2</sub>Te<sub>3</sub> sample, and 0.19 for the Polyol-Bi<sub>2</sub>Te<sub>3</sub> sample.

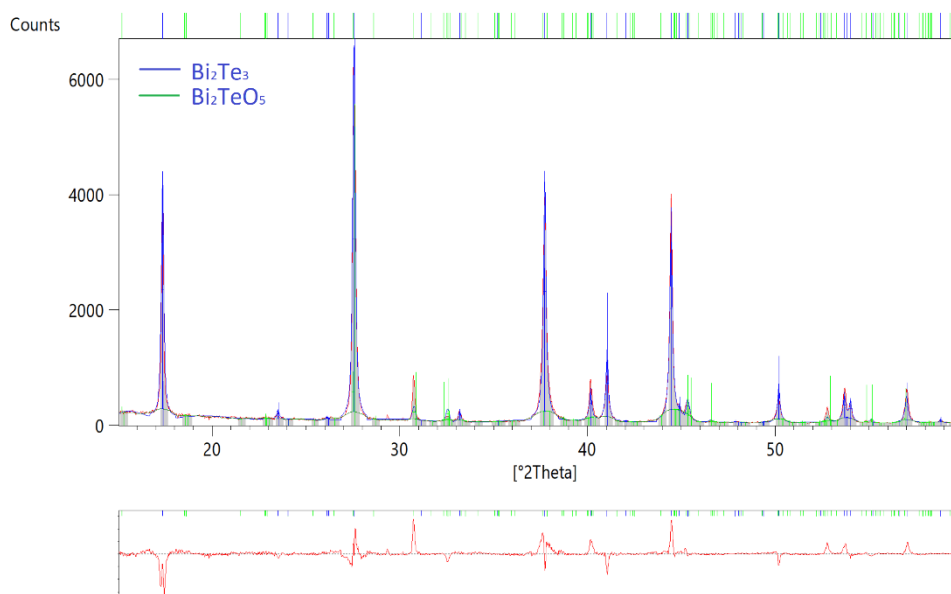

**Figure S3:** Rietveld refinement for Hydro-Bi<sub>2</sub>Te<sub>3</sub> sample after SPS sintering. Quantification based on the Rietveld refinement yielded about 5.8% Bi<sub>2</sub>TeO<sub>5</sub> phase.

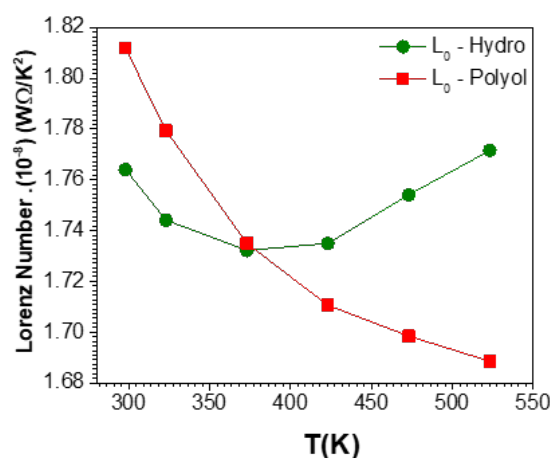

**Figure S4:** Lorenz Number,  $L_o$ , estimated for  $\text{Bi}_2\text{Te}_3$  samples using parabolic band model.

## References

1. Wang, Z.; Wang, F. qiang; Chen, H.; Zhu, L.; Yu, H. jun; Jian, X. yu Synthesis and characterization of  $\text{Bi}_2\text{Te}_3$  nanotubes by a hydrothermal method. *J. Alloys Compd.* **2010**, 492, 50–53, doi:10.1016/j.jallcom.2009.11.155.
2. Novaconi, S.; Vlazan, P.; Malaescu, I.; Badea, I.; Grozescu, I.; Sfirloaga, P. Doped  $\text{Bi}_2\text{Te}_3$  nano-structured semiconductors obtained by ultrasonically assisted hydrothermal method. *Cent. Eur. J. Chem.* **2013**, 11, 1599–1605, doi:10.2478/s11532-013-0291-7.
3. Zheng, Y.Y.; Zhu, T.J.; Zhao, X.B.; Tu, J.P.; Cao, G.S. Sonochemical synthesis of nanocrystalline  $\text{Bi}_2\text{Te}_3$  thermoelectric compounds. *Mater. Lett.* **2005**, 59, 2886–2888, doi:10.1016/j.matlet.2005.04.035.
4. Giani, A.; Pascal-Delannoy, F.; Boyer, A.; Foucaran, A.; Gschwind, M.; Ancy, P. Elaboration of  $\text{Bi}_2\text{Te}_3$  by metal organic chemical vapor deposition. *Thin Solid Films* **1997**, 303, 1–3, doi:10.1016/S0040-6090(97)00089-8.
5. Venkatasubramanian, R.; Colpitts, T.; Watko, E.; Lamvik, M.; El-Masry, N. MOCVD of  $\text{Bi}_2\text{Te}_3$ ,  $\text{Sb}_2\text{Te}_3$  and their superlattice structures for thin-film thermoelectric applications. *J. Cryst. Growth* **1997**, 170, 817–821, doi:10.1016/S0022-0248(96)00656-2.
6. Lee, J.S.; Brittman, S.; Yu, D.; Park, H. Vapor-Liquid-Solid and Vapor-Solid Growth of Phase-Change  $\text{Sb}_2\text{Te}_3$  Nanowires and  $\text{Sb}_2\text{Te}_3$  /  $\text{GeTe}$  Nanowire Heterostructures ". **2008**, 1–8.
7. Foos, E.E.; Stroud, R.M.; Berry, A.D. Synthesis and Characterization of Nanocrystalline Bismuth Telluride. *Nano Lett.* **2001**, 1, 693–695, doi:10.1021/nl0156179.
8. Gupta, S.; Neeleshwar, S.; Kumar, V.; Chen, Y.Y. Synthesis of bismuth telluride nanostructures by refluxing method. *Adv. Mater. Lett.* **2012**, 3, 50–54, doi:10.5185/amlett.2011.7285.
9. Sapp, S.A.; Lakshmi, B.B.; Martin, C.R. Template synthesis of bismuth telluride nano wires. *Adv. Mater.* **1999**, 11, 402–404, doi:10.1002/(SICI)1521-4095(199903)11:5<402::AID-

ADMA402>3.0.CO;2-L.

10. Dhak, D.; Pramanik, P. Characterization of nanocrystalline bismuth telluride ( $\text{Bi}_2\text{Te}_3$ ) synthesized by a novel approach through aqueous precursor method. *J. Am. Ceram. Soc.* **2006**, *89*, 534–537, doi:10.1111/j.1551-2916.2005.00784.x.
11. Saleemi, M.; Toprak, M.S.; Li, S.; Johnsson, M.; Muhammed, M. Synthesis, processing, and thermoelectric properties of bulk nanostructured bismuth telluride ( $\text{Bi}_2\text{Te}_3$ ). *J. Mater. Chem.* **2012**, *22*, 725–730, doi:10.1039/c1jm13880d.
12. Zhao, X.B.; Ji, X.H.; Zhang, Y.H.; Lu, B.H. Effect of solvent on the microstructures of nanostructured  $\text{Bi}_2\text{Te}_3$  prepared by solvothermal synthesis. *J. Alloys Compd.* **2004**, *368*, 349–352, doi:10.1016/j.jallcom.2003.08.070.
13. Deng, Y.; Wei, G.; Liu, J.; Zhou, X.; Wu, J.; Nan, C. Solvothermal preparation and characterization of nanocrystalline  $\text{SnTe}$  powder with different morphologies. *Xiyou Jinshu Cailiao Yu Gongcheng/Rare Met. Mater. Eng.* **2002**, *31*, 42.
14. Deng, Y.; Nan, C.W.; Wei, G.D.; Guo, L.; Lin, Y.H. Organic-assisted growth of bismuth telluride nanocrystals. *Chem. Phys. Lett.* **2003**, *374*, 410–415, doi:10.1016/S0009-2614(03)00783-8.
15. Jin, R.; Liu, J.; Li, G. Facile solvothermal synthesis, growth mechanism and thermoelectric property of flower-like  $\text{Bi}_2\text{Te}_3$ . *Cryst. Res. Technol.* **2014**, *49*, 460–466, doi:10.1002/crat.201400012.
16. Stavila, V.; Robinson, D.B.; Hekmaty, M.A.; Nishimoto, R.; Medlin, D.L.; Zhu, S.; Tritt, T.M.; Sharma, P.A. Wet-chemical synthesis and consolidation of stoichiometric bismuth telluride nanoparticles for improving the thermoelectric figure-of-merit. *ACS Appl. Mater. Interfaces* **2013**, *5*, 6678–6686, doi:10.1021/am401444w.
17. Xu, Y.; Ren, Z.; Cao, G.; Ren, W.; Deng, K.; Zhong, Y. Fabrication and characterization of  $\text{Bi}_2\text{Te}_3$  nanoplates via a simple solvothermal process. *Phys. B Condens. Matter* **2009**, *404*, 4029–4033, doi:10.1016/j.physb.2009.07.153.
18. Kim, C.; Kim, D.H.; Han, Y.S.; Chung, J.S.; Park, S.H.; Kim, H. Fabrication of bismuth telluride nanoparticles using a chemical synthetic process and their thermoelectric evaluations. *Powder Technol.* **2011**, *214*, 463–468, doi:10.1016/j.powtec.2011.08.049.
19. Giri, L.; Mallick, G.; Jackson, A.C.; Griep, M.H.; Karna, S.P. Synthesis and characterization of high-purity, single phase hexagonal  $\text{Bi}_2\text{Te}_3$  nanostructures. *RSC Adv.* **2015**, *5*, 24930–24935, doi:10.1039/c5ra02303c.
20. Xu, Y.; Ren, Z.; Ren, W.; Cao, G.; Deng, K.; Zhong, Y. Hydrothermal synthesis of single-crystalline  $\text{Bi}_2\text{Te}_3$  nanoplates. *Mater. Lett.* **2008**, *62*, 4273–4276, doi:10.1016/j.matlet.2008.06.055.
21. Sun, T.; Zhao, X.B.; Zhu, T.J.; Tu, J.P. Aqueous chemical reduction synthesis of  $\text{Bi}_2\text{Te}_3$  nanowires with surfactant assistance. *Mater. Lett.* **2006**, *60*, 2534–2537, doi:10.1016/j.matlet.2006.01.033.
22. Kim, H.J.; Han, M.; Kim, H.; Lee, W.; Kim, S. Morphology Controlled Synthesis of Nanostructured  $\text{Bi}_2\text{Te}_3$ . **2012**, *33*, 3977–3980.
23. Zhou, B.; Zhao, Y.; Pu, L.; Zhu, J.J. Microwave-assisted synthesis of nanocrystalline  $\text{Bi}_2\text{Te}_3$ . *Mater. Chem. Phys.* **2006**, *96*, 192–196, doi:10.1016/j.matchemphys.2005.07.010.
24. Zhang, Y.; Xu, G.; Mi, J.; Han, F.; Wang, Z.; Ge, C. Hydrothermal synthesis and thermoelectric properties of nanostructured  $\text{Bi}_{0.5}\text{Sb}_{1.5}\text{Te}_3$  compounds. *Mater. Res. Bull.* **2011**, *46*, 760–764, doi:10.1016/j.materresbull.2010.11.024.
25. Pelz, U.; Kaspar, K.; Schmidt, S.; Dold, M.; Jägle, M.; Pfaadt, A.; Hillebrecht, H. An aqueous-chemistry approach to nano-bismuth telluride and nano-antimony telluride as thermoelectric materials. *J. Electron. Mater.* **2012**, *41*, 1851–1857, doi:10.1007/s11664-012-2099-1.

26. Cao, Y.Q.; Zhu, T.J.; Zhao, X.B. Thermoelectric Bi<sub>2</sub>Te<sub>3</sub> nanotubes synthesized by low-temperature aqueous chemical method. *J. Alloys Compd.* **2008**, *449*, 109–112, doi:10.1016/j.jallcom.2006.01.116.
27. Hamawandi, B.; Ballikaya, S.; Batili, H.; Roosmark, V.; Orlovská, M.; Yusuf, A.; Johnsson, M.; Szukiewicz, R.; Kuchowicz, M.; Toprak, M.S. Facile solution synthesis, processing and characterization of n-and p-type binary and ternary Bi-Sb tellurides. *Appl. Sci.* **2020**, *10*, doi:10.3390/app10031178.
